# Supplementary material for: The utility of low-density genotyping for imputation in the Thoroughbred horse
Source: PubMed Central journal article supplement (PMC3930001; doi:10.1186/1297-9686-46-9), 2014-02-04
Supplement: 1297-9686-46-9-S1.pdf [file 1297-9686-46-9-S1.pdf]

**Table S1** Quality control criteria implemented on genotype data and the number of SNPs discarded at each step. This quality control was carried out as part of a larger study involving a total of 1342 samples.

| <b>Metric examined</b>          | <b>Purpose of metric applied</b>                                                                       | <b>Threshold applied</b>                   | <b>Number of SNP removed at this stage</b> |
|---------------------------------|--------------------------------------------------------------------------------------------------------|--------------------------------------------|--------------------------------------------|
| Cluster separation <sup>I</sup> | Removal of SNPs with inadequately defined clusters                                                     | <0.25 discarded                            | 1319                                       |
| Call frequency                  | Removal of SNPs which were not called in a minimum number of samples                                   | <98% call rate discarded                   | 2380                                       |
| AB R Mean <sup>II</sup>         | Removal of SNPs with low intensity data                                                                | <0.15 discarded                            | 7                                          |
| AB T Mean <sup>III</sup>        | Removal of SNPs for which the heterozygote cluster was not well separated from the homozygote clusters | <0.2 and >0.8 discarded                    | 20                                         |
| Heterozygote excess             | Removal of SNPs which deviate significantly from Hardy-Weinberg equilibrium                            | Heterozygosity of <-0.3 and >0.1 discarded | 149                                        |
| ECAX markers                    | Removal of X chromosome markers for which the males were called heterozygous                           | Each marker assessed individually          | 20                                         |

<sup>I</sup>Measures the separation between the three genotype clusters and varies from 0 to 1

<sup>II</sup>Mean normalized intensity of the heterozygote cluster, with values increasing from 0

<sup>III</sup>Mean of the normalized theta values of the heterozygote cluster, with values ranging from 0-1. Values of <0.2 and >0.8 indicate that the heterozygote cluster has shifted towards the homozygotes.
