# Supplementary material for: The utility of low-density genotyping for imputation in the Thoroughbred horse
Source: PubMed Central journal article supplement (PMC3930001; doi:10.1186/1297-9686-46-9), 2014-02-04
Supplement: 1297-9686-46-9-S3.pdf [file 1297-9686-46-9-S3.pdf]

**Figure S1** LD Maps

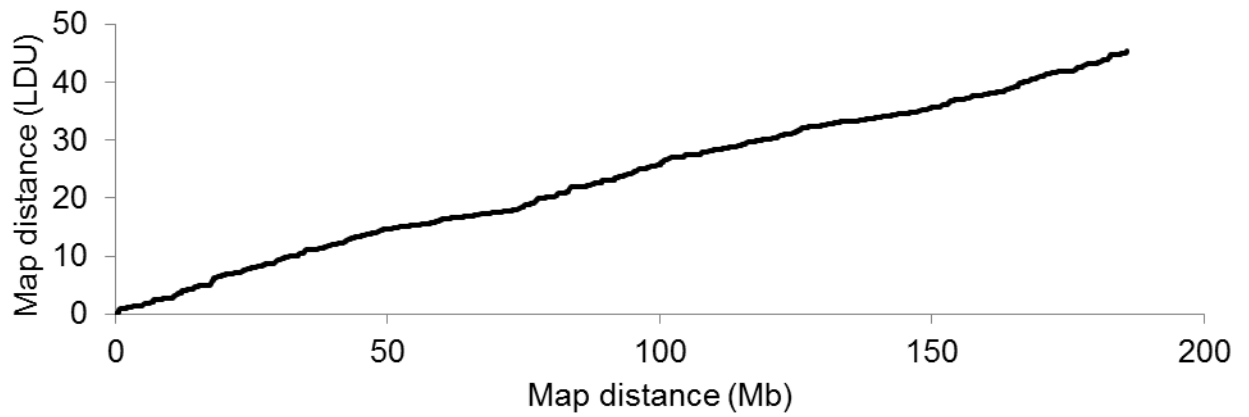

a) ECA1

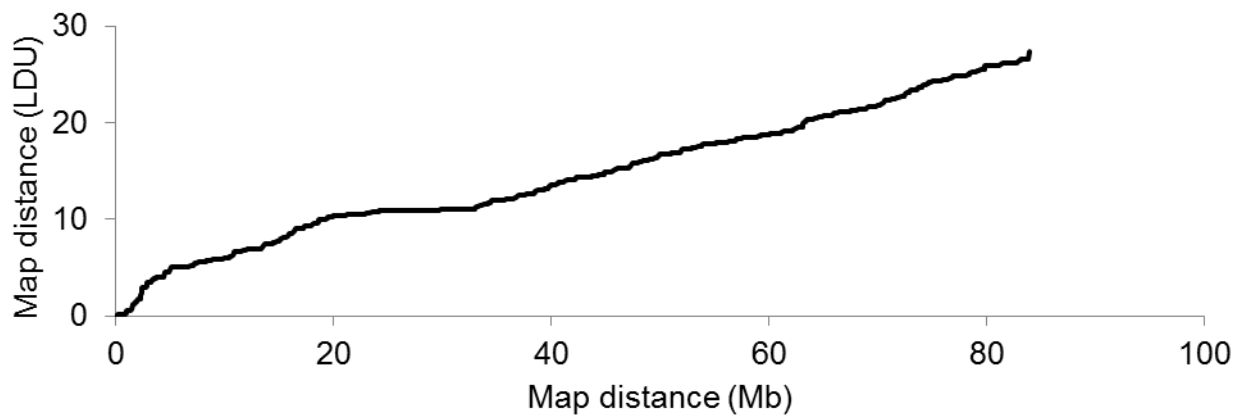

b) ECA10

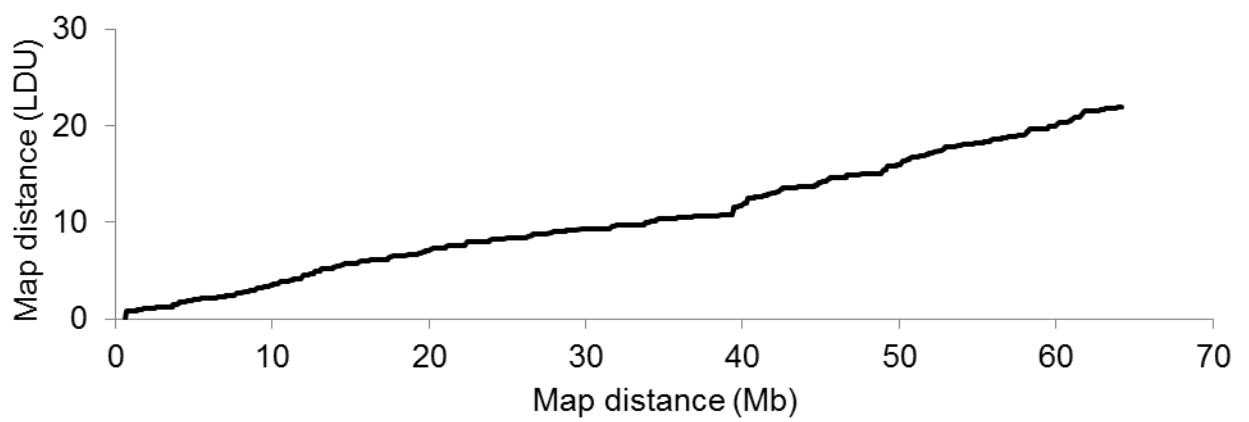

c) ECA20

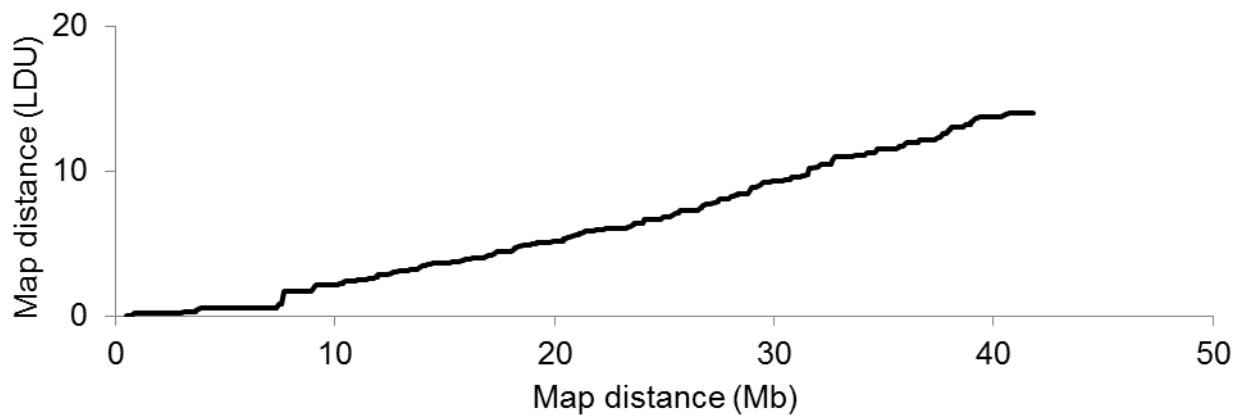

d) ECA26
