# Supplementary material for: The utility of low-density genotyping for imputation in the Thoroughbred horse
Source: PubMed Central journal article supplement (PMC3930001; doi:10.1186/1297-9686-46-9), 2014-02-04
Supplement: 1297-9686-46-9-S4.pdf [file 1297-9686-46-9-S4.pdf]

**Table S2** The mean proportion of correctly imputed genotypes, as calculated in the within-population analysis of the UK dataset

a) Per individual

| <b>Chromosome</b> | <b>Number of SNPs<sup>1</sup></b> | <b>bpEQ</b>      | <b>bpMAF</b>     | <b>lduMAF</b>    |
|-------------------|-----------------------------------|------------------|------------------|------------------|
| <b>ECA1</b>       | 384                               | 0.66 (0.52,0.93) | 0.67 (0.55,0.94) | 0.69 (0.55,0.92) |
|                   | 768                               | 0.76 (0.59,0.94) | 0.77 (0.62,0.95) | 0.78 (0.59,0.96) |
|                   | 1K                                | 0.79 (0.61,0.94) | 0.84 (0.66,0.97) | 0.83 (0.64,0.98) |
|                   | 2K                                | 0.90 (0.70,0.99) | 0.91 (0.71,0.99) | 0.89 (0.68,0.99) |
|                   | 3K                                | 0.94 (0.70,0.99) | 0.95 (0.73,1.00) | 0.92 (0.67,0.99) |
|                   | 6K                                | 0.97 (0.79,1.00) | 0.98 (0.78,1.00) | 0.95 (0.75,1.00) |
| <b>ECA10</b>      | 384                               | 0.65 (0.51,0.99) | 0.63 (0.41,0.99) | 0.62 (0.49,0.96) |
|                   | 768                               | 0.71 (0.53,0.98) | 0.70 (0.52,0.99) | 0.71 (0.51,0.99) |
|                   | 1K                                | 0.77 (0.61,0.98) | 0.78 (0.57,0.98) | 0.76 (0.47,0.99) |
|                   | 2K                                | 0.87 (0.70,0.99) | 0.88 (0.70,0.99) | 0.90 (0.64,1.00) |
|                   | 3K                                | 0.92 (0.78,1.00) | 0.93 (0.83,1.00) | 0.93 (0.76,1.00) |
|                   | 6K                                | 0.97 (0.86,1.00) | 0.97 (0.91,1.00) | 0.96 (0.85,1.00) |
| <b>ECA20</b>      | 384                               | 0.59 (0.45,0.90) | 0.59 (0.45,0.87) | 0.60 (0.43,0.87) |
|                   | 768                               | 0.67 (0.51,0.93) | 0.68 (0.51,0.93) | 0.68 (0.50,0.94) |
|                   | 1K                                | 0.69 (0.48,0.94) | 0.74 (0.55,0.99) | 0.74 (0.53,0.98) |
|                   | 2K                                | 0.82 (0.61,0.98) | 0.85 (0.66,0.99) | 0.87 (0.68,0.99) |
|                   | 3K                                | 0.90 (0.71,0.99) | 0.92 (0.76,0.99) | 0.92 (0.67,1.00) |
|                   | 6K                                | 0.96 (0.86,1.00) | 0.96 (0.90,1.00) | 0.95 (0.85,1.00) |
| <b>ECA26</b>      | 384                               | 0.59 (0.38,0.93) | 0.60 (0.41,0.93) | 0.62 (0.40,0.98) |
|                   | 768                               | 0.70 (0.51,0.98) | 0.72 (0.50,0.95) | 0.72 (0.49,0.98) |
|                   | 1K                                | 0.71 (0.50,0.96) | 0.76 (0.53,0.98) | 0.78 (0.55,1.00) |
|                   | 2K                                | 0.82 (0.56,1.00) | 0.85 (0.56,1.00) | 0.88 (0.54,1.00) |
|                   | 3K                                | 0.92 (0.62,1.00) | 0.92 (0.72,1.00) | 0.92 (0.65,1.00) |
|                   | 6K                                | 0.96 (0.80,1.00) | 0.97 (0.81,1.00) | 0.94 (0.61,1.00) |

Mean proportion of correctly imputed genotypes per individual, with minimum and maximum values in brackets; <sup>1</sup>total number of SNPs that would be on a genome-wide LDP of equivalent density.

## b) Per SNP

| Chromosome   | Number of SNPs <sup>1</sup> | bpEQ             | bpMAF            | IduMAF           |
|--------------|-----------------------------|------------------|------------------|------------------|
| <b>ECA1</b>  | 384                         | 0.66 (0.30,1.00) | 0.67 (0.30,1.00) | 0.69 (0.36,1.00) |
|              | 768                         | 0.76 (0.37,1.00) | 0.77 (0.44,1.00) | 0.78 (0.50,1.00) |
|              | 1K                          | 0.79 (0.44,1.00) | 0.84 (0.50,1.00) | 0.83 (0.53,1.00) |
|              | 2K                          | 0.90 (0.56,1.00) | 0.91 (0.63,1.00) | 0.89 (0.53,1.00) |
|              | 3K                          | 0.94 (0.68,1.00) | 0.95 (0.72,1.00) | 0.92 (0.66,1.00) |
|              | 6K                          | 0.97 (0.79,1.00) | 0.98 (0.83,1.00) | 0.95 (0.72,1.00) |
| <b>ECA10</b> | 384                         | 0.65 (0.24,1.00) | 0.63 (0.31,1.00) | 0.62 (0.34,1.00) |
|              | 768                         | 0.71 (0.32,1.00) | 0.70 (0.35,1.00) | 0.71 (0.40,1.00) |
|              | 1K                          | 0.77 (0.36,1.00) | 0.78 (0.36,1.00) | 0.76 (0.44,1.00) |
|              | 2K                          | 0.87 (0.44,1.00) | 0.88 (0.47,1.00) | 0.90 (0.66,1.00) |
|              | 3K                          | 0.92 (0.48,1.00) | 0.93 (0.45,1.00) | 0.93 (0.74,1.00) |
|              | 6K                          | 0.97 (0.64,1.00) | 0.97 (0.65,1.00) | 0.96 (0.74,1.00) |
| <b>ECA20</b> | 384                         | 0.59 (0.33,1.00) | 0.59 (0.34,1.00) | 0.60 (0.34,1.00) |
|              | 768                         | 0.67 (0.37,1.00) | 0.68 (0.35,1.00) | 0.68 (0.40,1.00) |
|              | 1K                          | 0.69 (0.39,1.00) | 0.74 (0.48,1.00) | 0.74 (0.44,1.00) |
|              | 2K                          | 0.82 (0.57,1.00) | 0.85 (0.56,1.00) | 0.87 (0.60,1.00) |
|              | 3K                          | 0.90 (0.66,1.00) | 0.92 (0.75,1.00) | 0.92 (0.69,1.00) |
|              | 6K                          | 0.96 (0.83,1.00) | 0.96 (0.86,1.00) | 0.95 (0.82,1.00) |
| <b>ECA26</b> | 384                         | 0.59 (0.27,1.00) | 0.60 (0.31,1.00) | 0.62 (0.34,1.00) |
|              | 768                         | 0.70 (0.39,1.00) | 0.72 (0.42,1.00) | 0.72 (0.42,1.00) |
|              | 1K                          | 0.71 (0.36,1.00) | 0.76 (0.47,1.00) | 0.78 (0.52,1.00) |
|              | 2K                          | 0.82 (0.48,1.00) | 0.85 (0.52,1.00) | 0.88 (0.61,1.00) |
|              | 3K                          | 0.92 (0.71,1.00) | 0.92 (0.71,1.00) | 0.92 (0.77,1.00) |
|              | 6K                          | 0.96 (0.82,1.00) | 0.97 (0.87,1.00) | 0.94 (0.84,1.00) |

Mean proportion of correctly imputed genotypes per SNP, with minimum and maximum values in brackets; <sup>1</sup>total number of SNPs that would be on a genome-wide LDP of equivalent density.
