# Supplementary material for: The utility of low-density genotyping for imputation in the Thoroughbred horse
Source: PubMed Central journal article supplement (PMC3930001; doi:10.1186/1297-9686-46-9), 2014-02-04
Supplement: 1297-9686-46-9-S5.pdf [file 1297-9686-46-9-S5.pdf]

**Figure S2** The mean proportion of correctly imputed genotypes and its variance across SNPs

As calculated in the within-population analysis of the UK dataset and plotted against the total number of SNPs that would be on a genome-wide LDP of equivalent density.

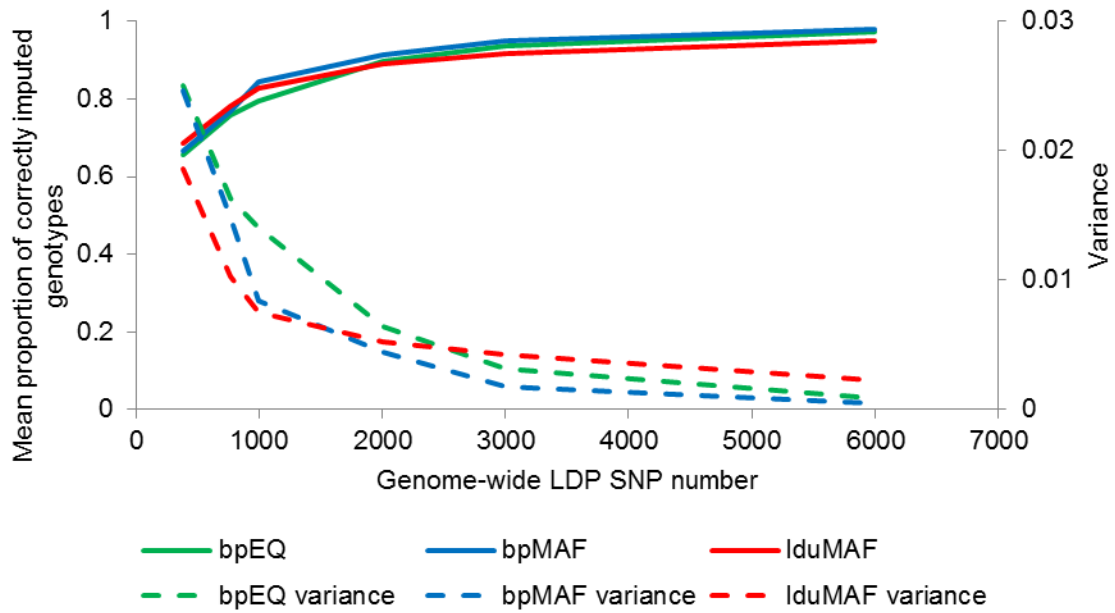

a) ECA1

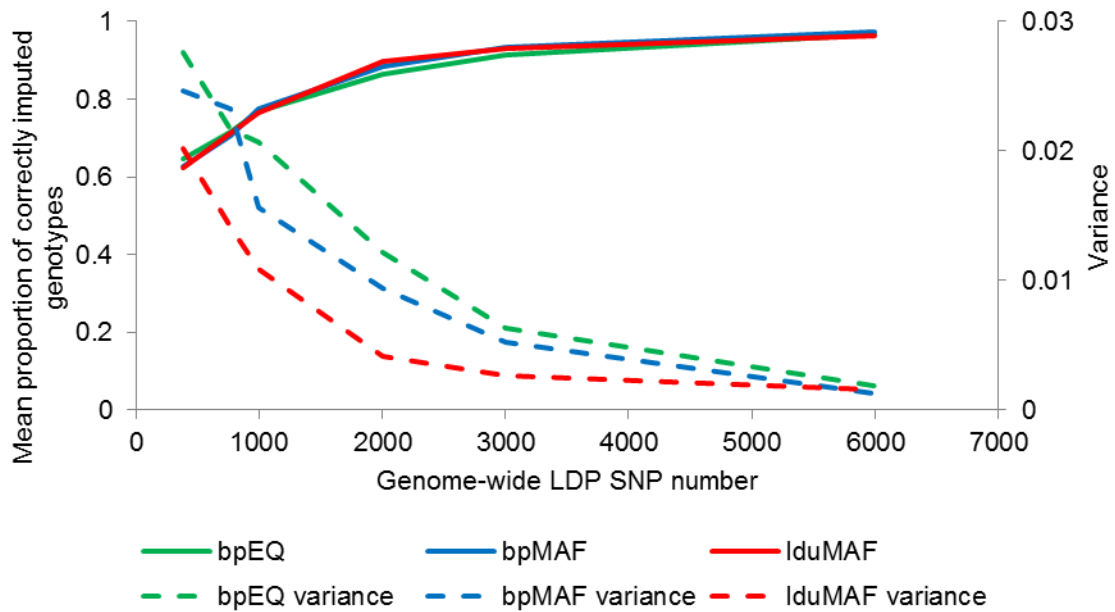

b) ECA10

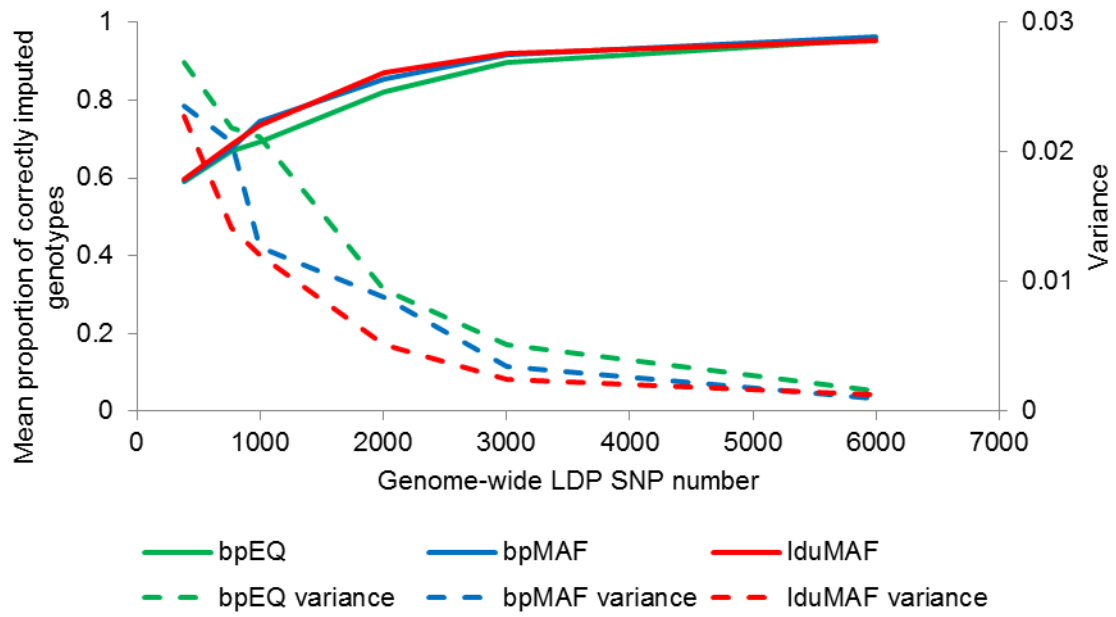

c) ECA20

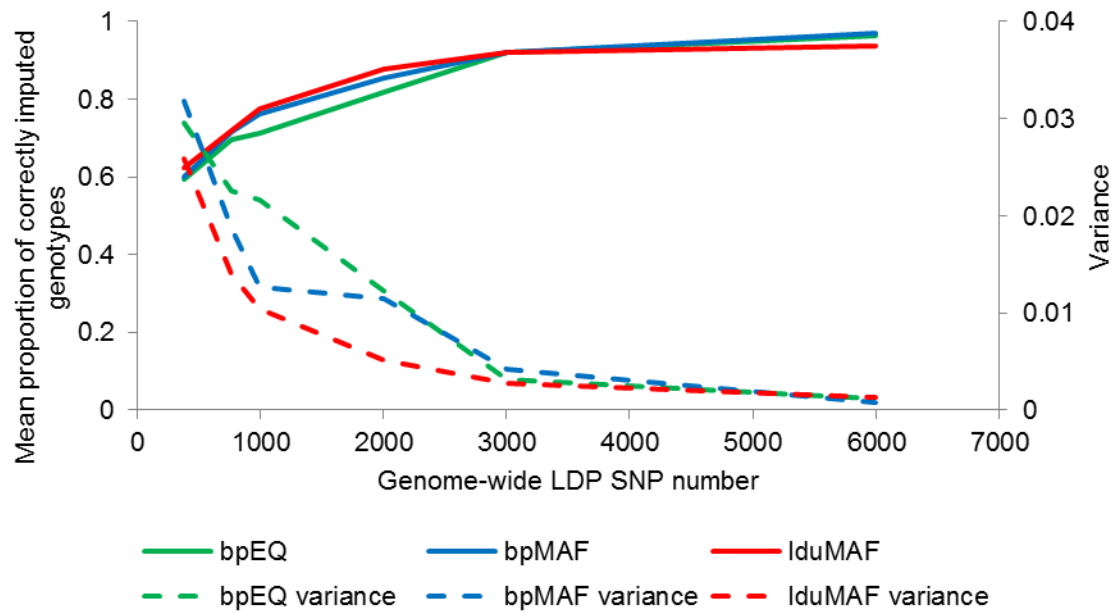

d) ECA26
