# Supplementary material for: The utility of low-density genotyping for imputation in the Thoroughbred horse
Source: PubMed Central journal article supplement (PMC3930001; doi:10.1186/1297-9686-46-9), 2014-02-04
Supplement: 1297-9686-46-9-S6.pdf [file 1297-9686-46-9-S6.pdf]

**Table S3** Properties of low density panel SNPs, as calculated in the within-population analysis of the UK dataset

a) ECA1

| <b>Number of SNPs<sup>1</sup></b> | <b>Method</b> | <b>Mean (SD) MAF</b> | <b>Mean (SD) distance between SNPs (Mb)</b> |
|-----------------------------------|---------------|----------------------|---------------------------------------------|
| 384                               | bpEQ          | 0.22 (0.13)          | 6.40 (0.09)                                 |
|                                   | bpMAF         | 0.25 (0.10)          | 6.40 (0.66)                                 |
|                                   | lduMAF        | 0.44 (0.06)          | 6.40 (2.41)                                 |
| 768                               | bpEQ          | 0.25 (0.15)          | 3.14 (0.09)                                 |
|                                   | bpMAF         | 0.31 (0.13)          | 3.14 (0.57)                                 |
|                                   | lduMAF        | 0.45 (0.04)          | 3.14 (1.65)                                 |
| 1K                                | bpEQ          | 0.22 (0.14)          | 2.41 (0.07)                                 |
|                                   | bpMAF         | 0.39 (0.08)          | 2.38 (0.61)                                 |
|                                   | lduMAF        | 0.45 (0.04)          | 2.38 (1.42)                                 |
| 2K                                | bpEQ          | 0.23 (0.14)          | 1.19 (0.06)                                 |
|                                   | bpMAF         | 0.28 (0.11)          | 1.19 (0.30)                                 |
|                                   | lduMAF        | 0.46 (0.04)          | 1.19 (1.19)                                 |
| 3K                                | bpEQ          | 0.23 (0.14)          | 0.79 (0.06)                                 |
|                                   | bpMAF         | 0.30 (0.12)          | 0.79 (0.23)                                 |
|                                   | lduMAF        | 0.46 (0.03)          | 0.79 (0.92)                                 |
| 6K                                | bpEQ          | 0.23 (0.14)          | 0.39 (0.07)                                 |
|                                   | bpMAF         | 0.29 (0.11)          | 0.39 (0.17)                                 |
|                                   | lduMAF        | 0.43 (0.05)          | 0.39 (0.63)                                 |

Properties of low density panel SNPs for ECA1 selected using three methods, as calculated in the within-population analysis of the UK dataset; <sup>1</sup>total number of SNPs that would be on a genome-wide LDP of equivalent density.

b) ECA10

| <b>Number of SNPs<sup>1</sup></b> | <b>Method</b> | <b>Mean (SD) MAF</b> | <b>Mean (SD) distance between SNPs (Mb)</b> |
|-----------------------------------|---------------|----------------------|---------------------------------------------|
| 384                               | bpEQ          | 0.25 (0.16)          | 6.46 (0.11)                                 |
|                                   | bpMAF         | 0.29 (0.14)          | 6.46 (0.17)                                 |
|                                   | lduMAF        | 0.43 (0.10)          | 6.45 (2.51)                                 |
| 768                               | bpEQ          | 0.22 (0.14)          | 3.23 (0.08)                                 |
|                                   | bpMAF         | 0.25 (0.12)          | 3.23 (0.30)                                 |
|                                   | lduMAF        | 0.44 (0.07)          | 3.23 (2.16)                                 |
| 1K                                | bpEQ          | 0.26 (0.16)          | 2.47 (0.06)                                 |
|                                   | bpMAF         | 0.33 (0.12)          | 2.47 (0.28)                                 |
|                                   | lduMAF        | 0.44 (0.07)          | 2.47 (1.89)                                 |
| 2K                                | bpEQ          | 0.24 (0.14)          | 1.20 (0.06)                                 |
|                                   | bpMAF         | 0.29 (0.11)          | 1.20 (0.20)                                 |
|                                   | lduMAF        | 0.46 (0.05)          | 1.20 (0.95)                                 |
| 3K                                | bpEQ          | 0.25 (0.13)          | 0.80 (0.06)                                 |
|                                   | bpMAF         | 0.30 (0.12)          | 0.80 (0.16)                                 |
|                                   | lduMAF        | 0.47 (0.04)          | 0.80 (0.75)                                 |
| 6K                                | bpEQ          | 0.26 (0.14)          | 0.40 (0.07)                                 |
|                                   | bpMAF         | 0.31 (0.11)          | 0.40 (0.10)                                 |
|                                   | lduMAF        | 0.46 (0.04)          | 0.40 (0.44)                                 |

Properties of low density panel SNPs for ECA10 selected using three methods, as calculated in the within-population analysis of the UK dataset; <sup>1</sup>total number of SNPs that would be on a genome-wide LDP of equivalent density.

c) ECA20

| <b>Number of SNPs<sup>1</sup></b> | <b>Method</b> | <b>Mean (SD) MAF</b> | <b>Mean (SD) distance between SNPs (Mb)</b> |
|-----------------------------------|---------------|----------------------|---------------------------------------------|
| 384                               | bpEQ          | 0.28 (0.13)          | 7.06 (0.21)                                 |
|                                   | bpMAF         | 0.33 (0.12)          | 7.06 (0.09)                                 |
|                                   | lduMAF        | 0.44 (0.09)          | 7.06 (2.20)                                 |
| 768                               | bpEQ          | 0.26 (0.15)          | 3.18 (0.16)                                 |
|                                   | bpMAF         | 0.29 (0.11)          | 3.18 (0.12)                                 |
|                                   | lduMAF        | 0.46 (0.06)          | 3.18 (1.25)                                 |
| 1K                                | bpEQ          | 0.21 (0.13)          | 2.44 (0.14)                                 |
|                                   | bpMAF         | 0.40 (0.08)          | 2.44 (0.34)                                 |
|                                   | lduMAF        | 0.46 (0.05)          | 2.44 (1.12)                                 |
| 2K                                | bpEQ          | 0.24 (0.14)          | 1.20 (0.11)                                 |
|                                   | bpMAF         | 0.29 (0.11)          | 1.20 (0.18)                                 |
|                                   | lduMAF        | 0.46 (0.04)          | 1.20 (0.62)                                 |
| 3K                                | bpEQ          | 0.26 (0.14)          | 0.79 (0.10)                                 |
|                                   | bpMAF         | 0.30 (0.11)          | 0.79 (0.14)                                 |
|                                   | lduMAF        | 0.47 (0.04)          | 0.79 (0.53)                                 |
| 6K                                | bpEQ          | 0.25 (0.14)          | 0.40 (0.06)                                 |
|                                   | bpMAF         | 0.29 (0.11)          | 0.39 (0.10)                                 |
|                                   | lduMAF        | 0.46 (0.03)          | 0.39 (0.41)                                 |

Properties of low density panel SNPs for ECA20 selected using three methods, as calculated in the within-population analysis of the UK dataset; <sup>1</sup>total number of SNPs that would be on a genome-wide LDP of equivalent density.

d) ECA26

| <b>Number of SNPs<sup>1</sup></b> | <b>Method</b> | <b>Mean (SD) MAF</b> | <b>Mean (SD) distance between SNPs (Mb)</b> |
|-----------------------------------|---------------|----------------------|---------------------------------------------|
| 384                               | bpEQ          | 0.28 (0.16)          | 6.89 (0.16)                                 |
|                                   | bpMAF         | 0.30 (0.13)          | 6.89 (0.05)                                 |
|                                   | lduMAF        | 0.47 (0.02)          | 6.89 (1.99)                                 |
| 768                               | bpEQ          | 0.27 (0.15)          | 3.18 (0.14)                                 |
|                                   | bpMAF         | 0.36 (0.12)          | 3.18 (0.17)                                 |
|                                   | lduMAF        | 0.47 (0.02)          | 3.18 (1.34)                                 |
| 1K                                | bpEQ          | 0.27 (0.15)          | 2.43 (0.16)                                 |
|                                   | bpMAF         | 0.45 (0.03)          | 2.43 (0.23)                                 |
|                                   | lduMAF        | 0.47 (0.05)          | 2.42 (1.39)                                 |
| 2K                                | bpEQ          | 0.28 (0.16)          | 1.22 (0.12)                                 |
|                                   | bpMAF         | 0.34 (0.13)          | 1.22 (0.13)                                 |
|                                   | lduMAF        | 0.47 (0.02)          | 1.22 (0.61)                                 |
| 3K                                | bpEQ          | 0.30 (0.14)          | 0.79 (0.08)                                 |
|                                   | bpMAF         | 0.33 (0.13)          | 0.79 (0.12)                                 |
|                                   | lduMAF        | 0.47 (0.02)          | 0.79 (0.59)                                 |
| 6K                                | bpEQ          | 0.28 (0.15)          | 0.40 (0.07)                                 |
|                                   | bpMAF         | 0.31 (0.12)          | 0.39 (0.09)                                 |
|                                   | lduMAF        | 0.47 (0.02)          | 0.39 (0.40)                                 |

Properties of low density panel SNPs for ECA26 selected using three methods, as calculated in the within-population analysis of the UK dataset; <sup>1</sup>total number of SNPs that would be on a genome-wide LDP of equivalent density.
