# Supplementary material for: The utility of low-density genotyping for imputation in the Thoroughbred horse
Source: PubMed Central journal article supplement (PMC3930001; doi:10.1186/1297-9686-46-9), 2014-02-04
Supplement: 1297-9686-46-9-S7.pdf [file 1297-9686-46-9-S7.pdf]

**Table S4** The mean correlation between true and predicted genotypes, as calculated in the within-population analysis of the UK dataset

a) Per individual

| <b>Chromosome</b> | <b>Number of SNPs<sup>1</sup></b> | <b>bpEQ</b>       | <b>bpMAF</b>      | <b>lduMAF</b>     |
|-------------------|-----------------------------------|-------------------|-------------------|-------------------|
| <b>ECA1</b>       | 384                               | 0.46 (0.14,0.89)  | 0.49 (0.20,0.91)  | 0.53 (0.22,0.89)  |
|                   | 768                               | 0.64 (0.36,0.93)  | 0.66 (0.38,0.93)  | 0.69 (0.37,0.94)  |
|                   | 1K                                | 0.70 (0.41,0.93)  | 0.78 (0.51,0.96)  | 0.75 (0.47,0.98)  |
|                   | 2K                                | 0.86 (0.53,0.99)  | 0.88 (0.62,0.98)  | 0.85 (0.52,0.99)  |
|                   | 3K                                | 0.92 (0.59,0.99)  | 0.94 (0.60,1.00)  | 0.88 (0.48,0.99)  |
|                   | 6K                                | 0.97 (0.73,1.00)  | 0.97 (0.71,1.00)  | 0.93 (0.61,1.00)  |
| <b>ECA10</b>      | 384                               | 0.46 (0.11,0.98)  | 0.43 (0.04,0.98)  | 0.42 (0.00,0.94)  |
|                   | 768                               | 0.58 (0.20,0.97)  | 0.57 (0.04,0.98)  | 0.59 (0.26,0.99)  |
|                   | 1K                                | 0.67 (0.32,0.98)  | 0.68 (0.29,0.97)  | 0.66 (0.14,0.99)  |
|                   | 2K                                | 0.82 (0.56,0.98)  | 0.85 (0.59,0.98)  | 0.86 (0.42,1.00)  |
|                   | 3K                                | 0.89 (0.70,1.00)  | 0.91 (0.76,1.00)  | 0.91 (0.62,1.00)  |
|                   | 6K                                | 0.96 (0.80,1.00)  | 0.97 (0.87,1.00)  | 0.95 (0.76,1.00)  |
| <b>ECA20</b>      | 384                               | 0.37 (0.07,0.89)  | 0.36 (-0.01,0.83) | 0.37 (-0.06,0.84) |
|                   | 768                               | 0.51 (0.13,0.93)  | 0.53 (0.09,0.92)  | 0.54 (0.15,0.91)  |
|                   | 1K                                | 0.55 (0.12,0.93)  | 0.63 (0.27,0.99)  | 0.62 (0.24,0.97)  |
|                   | 2K                                | 0.76 (0.30,0.98)  | 0.80 (0.42,0.99)  | 0.82 (0.52,0.99)  |
|                   | 3K                                | 0.87 (0.58,0.99)  | 0.89 (0.63,0.99)  | 0.89 (0.46,1.00)  |
|                   | 6K                                | 0.95 (0.79,1.00)  | 0.96 (0.85,1.00)  | 0.93 (0.72,1.00)  |
| <b>ECA26</b>      | 384                               | 0.38 (-0.04,0.94) | 0.40 (0.01,0.93)  | 0.44 (-0.02,0.98) |
|                   | 768                               | 0.57 (0.17,0.97)  | 0.60 (0.16,0.94)  | 0.61 (0.13,0.97)  |
|                   | 1K                                | 0.60 (0.14, 0.95) | 0.67 (0.25,0.98)  | 0.70 (0.30,1.00)  |
|                   | 2K                                | 0.76 (0.29,1.00)  | 0.81 (0.31,1.00)  | 0.84 (0.16,1.00)  |
|                   | 3K                                | 0.90 (0.36,1.00)  | 0.90 (0.62,1.00)  | 0.90 (0.54,1.00)  |
|                   | 6K                                | 0.96 (0.78,1.00)  | 0.96 (0.79,1.00)  | 0.91 (0.49,1.00)  |

Mean correlation between true and predicted genotypes per individual, with minimum and maximum values in brackets; <sup>1</sup>total number of SNPs that would be on a genome-wide LDP of equivalent density.

## b) Per SNP

| Chromosome   | Number of SNPs <sup>1</sup> | bpEQ              | bpMAF             | lduMAF             |
|--------------|-----------------------------|-------------------|-------------------|--------------------|
| <b>ECA1</b>  | 384                         | 0.30 (-0.17,1.00) | 0.32 (-0.14,1.00) | 0.36 (-0.08,1.00)  |
|              | 768                         | 0.52 (-0.08,1.00) | 0.53 (-0.06,1.00) | 0.55 (-0.05,1.00)  |
|              | 1K                          | 0.60 (-0.04,1.00) | 0.67 (-0.05,1.00) | 0.64 (-0.05,1.00)  |
|              | 2K                          | 0.81 (-0.04,1.00) | 0.83 (-0.02,1.00) | 0.79 (-0.02,1.00)  |
|              | 3K                          | 0.89 (-0.01,1.00) | 0.90 (-0.03,1.00) | 0.83 (-0.02,1.00)  |
|              | 6K                          | 0.95 (0.25,1.00)  | 0.96 (0.49,1.00)  | 0.90 (-0.01,1.00)  |
| <b>ECA10</b> | 384                         | 0.31 (-0.13,1.00) | 0.28 (-0.14,1.00) | 0.26 (-0.09,1.00)  |
|              | 768                         | 0.46 (-0.10,1.00) | 0.45 (-0.09,1.00) | 0.46 (-0.08,1.00)  |
|              | 1K                          | 0.59 (-0.06,1.00) | 0.58 (-0.08,1.00) | 0.55 (-0.04,1.00)  |
|              | 2K                          | 0.76 (-0.04,1.00) | 0.79 (-0.06,1.00) | 0.80 (-0.02,1.00)  |
|              | 3K                          | 0.85 (0.20,1.00)  | 0.88 (-0.01,1.00) | 0.87 (0.13, 1.00)  |
|              | 6K                          | 0.94 (0.34,1.00)  | 0.95 (0.34,1.00)  | 0.93 (-0.01, 1.00) |
| <b>ECA20</b> | 384                         | 0.24 (-0.16,1.00) | 0.22 (-0.15,1.00) | 0.23 (-0.15,1.00)  |
|              | 768                         | 0.40 (-0.08,1.00) | 0.41 (-0.06,1.00) | 0.43 (-0.04,1.00)  |
|              | 1K                          | 0.46 (-0.06,1.00) | 0.54 (-0.03,1.00) | 0.52 (-0.03,1.00)  |
|              | 2K                          | 0.69 (-0.06,1.00) | 0.75 (-0.02,1.00) | 0.76 (-0.04,1.00)  |
|              | 3K                          | 0.83 (0.06,1.00)  | 0.86 (-0.03,1.00) | 0.86 (0.17,1.00)   |
|              | 6K                          | 0.93 (0.34,1.00)  | 0.94 (0.23,1.00)  | 0.92 (0.40,1.00)   |
| <b>ECA26</b> | 384                         | 0.20 (-0.17,1.00) | 0.23 (-0.16,1.00) | 0.27 (-0.13,1.00)  |
|              | 768                         | 0.44 (-0.03,1.00) | 0.46 (-0.04,1.00) | 0.47 (-0.03,1.00)  |
|              | 1K                          | 0.48 (-0.04,1.00) | 0.54 (-0.03,1.00) | 0.56 (-0.06,1.00)  |
|              | 2K                          | 0.67 (-0.03,1.00) | 0.74 (-0.02,1.00) | 0.76 (-0.04,1.00)  |
|              | 3K                          | 0.86 (-0.03,1.00) | 0.85 (-0.01,1.00) | 0.85 (0.21,1.00)   |
|              | 6K                          | 0.94 (0.50,1.00)  | 0.95 (0.69,1.00)  | 0.88 (-0.01,1.00)  |

Mean correlation between true and predicted genotypes per SNP, with minimum and maximum values in brackets; <sup>1</sup>total number of SNPs that would be on a genome-wide LDP of equivalent density.
